# Supplementary material
Source: Springer Nature journal article supplement (https://www.springermedizin.de/resource/supplementary/13685_2014_31_MOESM17_ESM.pdf/9681246)

### Liver GGT Activity

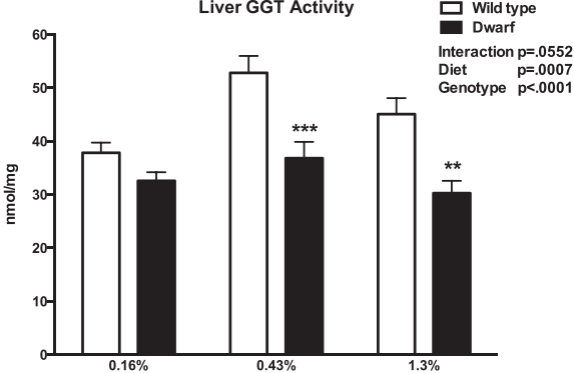

### Liver DCNB GST Activity

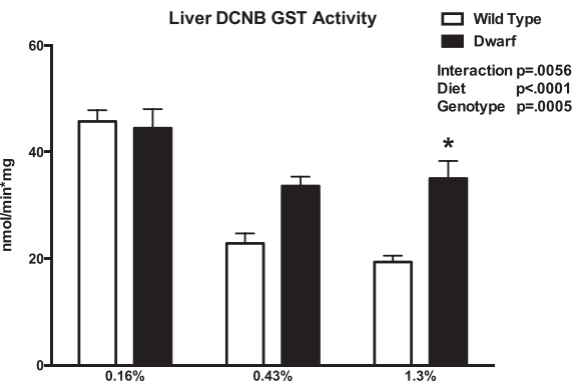

### Liver CDNB GST Activity

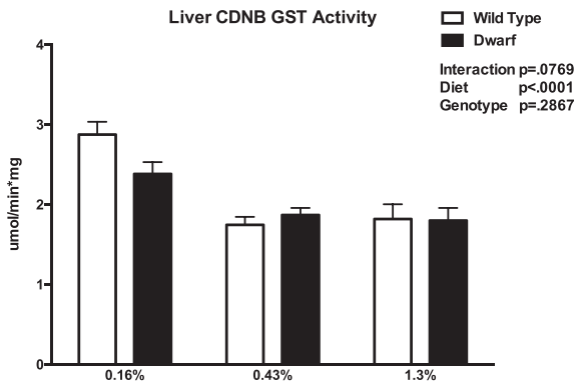

% methionine

Supplement: MOESM17 [file 9681246]
